# Supplementary material for: DeepGOPlus: improved protein function prediction from sequence
Source: Oxford University Press journal article supplement (doi:10.1093/bioinformatics/btz595), 2019-07-24
Supplement: btz595_supplementary_data.pdf [file btz595_supplementary_data.pdf]

Supplementary materials: DeepGOPlus:  
Improved protein function prediction from  
sequence

April 18, 2019

| #  | MaxKernel | Hidden Layers | Filters | Valid. Loss | Test Loss |
|----|-----------|---------------|---------|-------------|-----------|
| 1  | 32        | 1             | 32      | 0.04085     | 0.024466  |
| 2  | 64        | 1             | 32      | 0.04032     | 0.024393  |
| 3  | 128       | 1             | 32      | 0.04038     | 0.024314  |
| 4  | 256       | 1             | 32      | 0.04008     | 0.024610  |
| 5  | 512       | 1             | 32      | 0.04019     | 0.025172  |
| 6  | 32        | 2             | 32      | 0.04187     | 0.024399  |
| 7  | 64        | 2             | 32      | 0.04194     | 0.024147  |
| 8  | 128       | 2             | 32      | 0.04125     | 0.026296  |
| 9  | 256       | 2             | 32      | 0.04054     | 0.025792  |
| 10 | 512       | 2             | 32      | 0.04134     | 0.024686  |
| 11 | 32        | 3             | 32      | 0.04173     | 0.024688  |
| 12 | 64        | 3             | 32      | 0.04215     | 0.025352  |
| 13 | 128       | 3             | 32      | 0.04110     | 0.025408  |
| 14 | 256       | 3             | 32      | 0.04109     | 0.024851  |
| 15 | 512       | 3             | 32      | 0.04104     | 0.026999  |
| 16 | 32        | 1             | 64      | 0.04028     | 0.023811  |
| 17 | 64        | 1             | 64      | 0.04016     | 0.024081  |
| 18 | 128       | 1             | 64      | 0.04024     | 0.024422  |
| 19 | 256       | 1             | 64      | 0.03986     | 0.025013  |
| 20 | 512       | 1             | 64      | 0.04039     | 0.024882  |
| 21 | 32        | 2             | 64      | 0.04169     | 0.024334  |
| 22 | 64        | 2             | 64      | 0.04117     | 0.025407  |
| 23 | 128       | 2             | 64      | 0.04080     | 0.026773  |
| 24 | 256       | 2             | 64      | 0.04043     | 0.025632  |
| 25 | 512       | 2             | 64      | 0.04039     | 0.026199  |
| 26 | 32        | 3             | 64      | 0.04160     | 0.024624  |
| 27 | 64        | 3             | 64      | 0.04142     | 0.026038  |
| 28 | 128       | 3             | 64      | 0.04029     | 0.025585  |
| 29 | 256       | 3             | 64      | 0.04016     | 0.025938  |

|    |     |   |     |                |                 |
|----|-----|---|-----|----------------|-----------------|
| 30 | 512 | 3 | 64  | 0.04052        | 0.026569        |
| 31 | 32  | 1 | 128 | 0.03996        | 0.023886        |
| 32 | 64  | 1 | 128 | 0.03999        | 0.024146        |
| 33 | 128 | 1 | 128 | 0.03990        | 0.024231        |
| 34 | 256 | 1 | 128 | 0.03945        | 0.025394        |
| 35 | 512 | 1 | 128 | 0.04002        | 0.024113        |
| 36 | 32  | 2 | 128 | 0.04131        | 0.024404        |
| 37 | 64  | 2 | 128 | 0.04116        | 0.024885        |
| 38 | 128 | 2 | 128 | 0.04000        | 0.026053        |
| 39 | 256 | 2 | 128 | 0.04000        | 0.026025        |
| 40 | 512 | 2 | 128 | 0.04037        | 0.023884        |
| 41 | 32  | 3 | 128 | 0.04100        | 0.025189        |
| 42 | 64  | 3 | 128 | 0.04031        | 0.025051        |
| 43 | 128 | 3 | 128 | 0.03995        | 0.025764        |
| 44 | 256 | 3 | 128 | 0.04135        | 0.024185        |
| 45 | 512 | 3 | 128 | 0.04008        | 0.024312        |
| 46 | 32  | 1 | 256 | 0.03942        | 0.023801        |
| 47 | 64  | 1 | 256 | 0.03933        | 0.024252        |
| 48 | 128 | 1 | 256 | 0.03897        | 0.024517        |
| 49 | 256 | 1 | 256 | 0.03950        | 0.024034        |
| 50 | 512 | 1 | 256 | 0.04146        | 0.024329        |
| 51 | 32  | 2 | 256 | 0.04050        | 0.024755        |
| 52 | 64  | 2 | 256 | 0.04026        | 0.025917        |
| 53 | 128 | 2 | 256 | 0.03992        | 0.025778        |
| 54 | 256 | 2 | 256 | 0.03995        | 0.025696        |
| 55 | 512 | 2 | 256 | 0.04071        | 0.025106        |
| 56 | 32  | 3 | 256 | 0.04129        | 0.025048        |
| 57 | 64  | 3 | 256 | 0.03997        | 0.024811        |
| 58 | 128 | 3 | 256 | 0.03918        | 0.025124        |
| 59 | 256 | 3 | 256 | 0.03920        | 0.026214        |
| 60 | 512 | 3 | 256 | 0.04045        | 0.026019        |
| 61 | 32  | 1 | 512 | 0.03912        | 0.024001        |
| 62 | 64  | 1 | 512 | 0.03881        | 0.024483        |
| 63 | 128 | 1 | 512 | <b>0.03880</b> | 0.024031        |
| 64 | 256 | 1 | 512 | 0.03966        | 0.024428        |
| 65 | 512 | 1 | 512 | 0.04201        | 0.024437        |
| 66 | 32  | 2 | 512 | 0.03929        | 0.025065        |
| 67 | 64  | 2 | 512 | 0.03913        | 0.025310        |
| 68 | 128 | 2 | 512 | 0.03945        | 0.024313        |
| 69 | 256 | 2 | 512 | 0.03954        | 0.024128        |
| 70 | 512 | 2 | 512 | 0.04030        | 0.024147        |
| 71 | 32  | 3 | 512 | 0.03947        | <b>0.023562</b> |
| 72 | 64  | 3 | 512 | 0.03925        | 0.025331        |
| 73 | 128 | 3 | 512 | 0.03902        | 0.024775        |
| 74 | 256 | 3 | 512 | 0.03969        | 0.024065        |
| 75 | 512 | 3 | 512 | 0.03971        | 0.025466        |

Table 1: Different parameters used to tune the model
